# Supplementary material for: Search for Neuro-Endocrine Markers (Chromogranin A, Synaptophysin and VGF) in Breast Cancers. An integrated Approach Using Immunohistochemistry and Gene Expression Profiling
Source: PubMed Central journal article supplement (PMC4160574; doi:10.1007/s12022-013-9277-4), 2013-11-27

## Supplementary Material

### **Search for neuro-endocrine markers (Chromogranin A, Synaptophysin and VGF) in breast cancers. An integrated approach using immunohistochemistry and gene expression profiling**

Laura Annaratone<sup>1</sup>, Enzo Medico<sup>2</sup>, Nelson Rangel<sup>1</sup>, Isabella Castellano<sup>1</sup>, Caterina Marchiò<sup>1</sup>, Anna Sapino<sup>1</sup> and Gianni Bussolati<sup>1,3</sup>

<sup>1</sup> Department of Medical Sciences, University of Turin, Torino, Italy

<sup>2</sup> Laboratory of Oncogenomics and Department of Oncological Sciences, Institute for Cancer Research and Treatment, University of Turin, Candiolo, Italy

<sup>3</sup> “Victor Babes” Institute, Bucarest, Romania

#### **Corresponding author:**

Prof. Gianni Bussolati

“Victor Babes” Institute, Bucarest, Romania

Department of Medical Sciences

Via Santena 7, 10126 Turin - Italy

Tel.: +390116334274

Fax: +390116635267

[gianni.bussolati@unito.it](mailto:gianni.bussolati@unito.it)

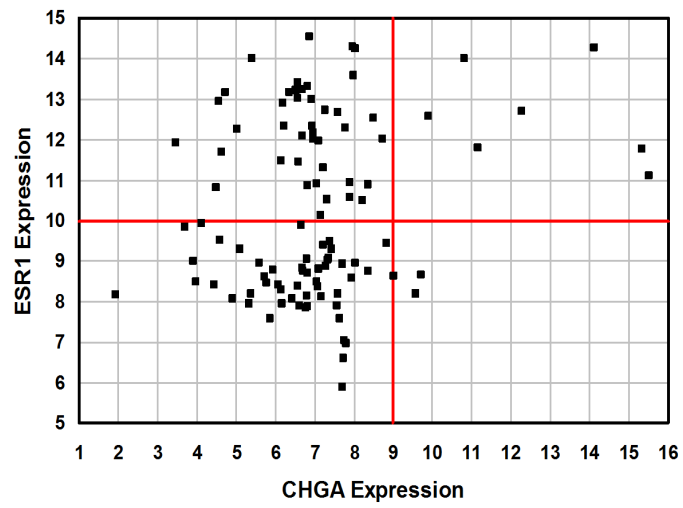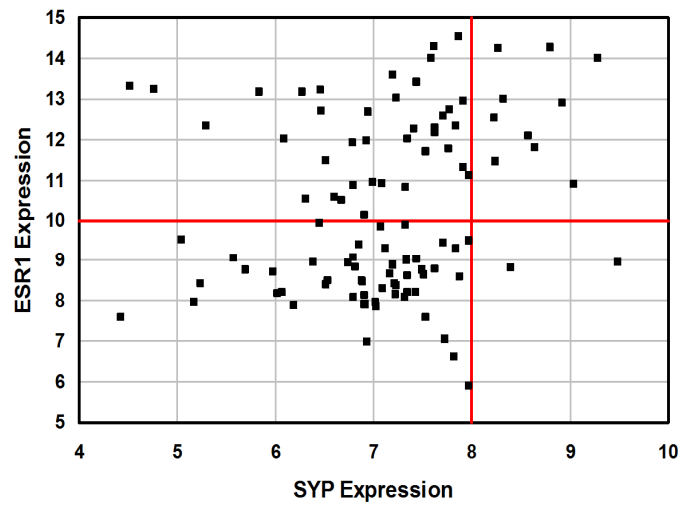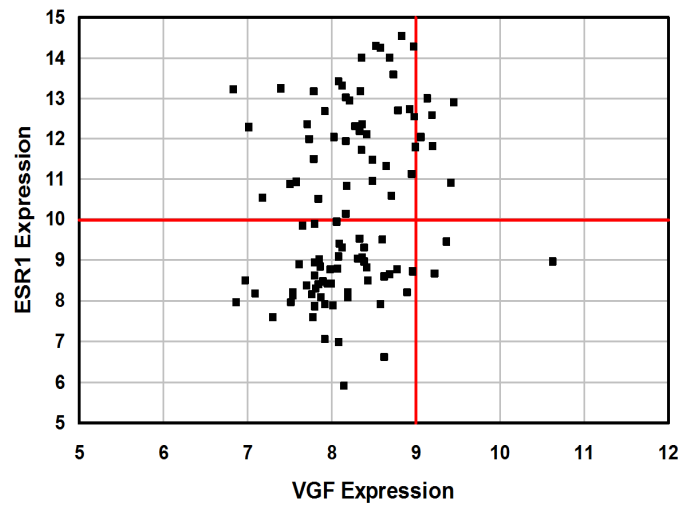

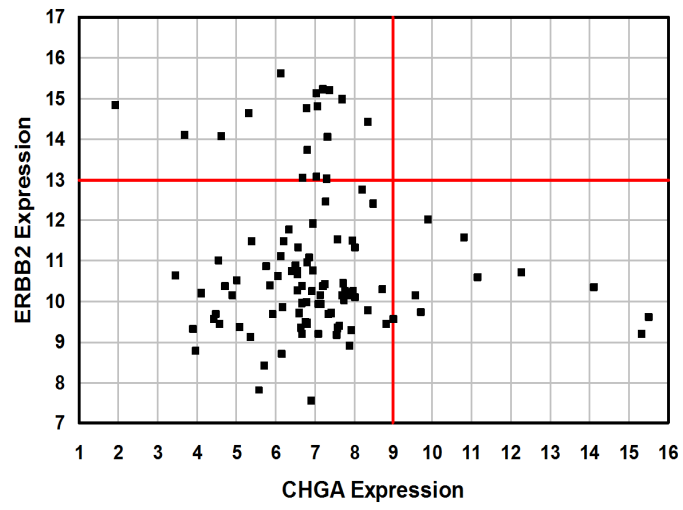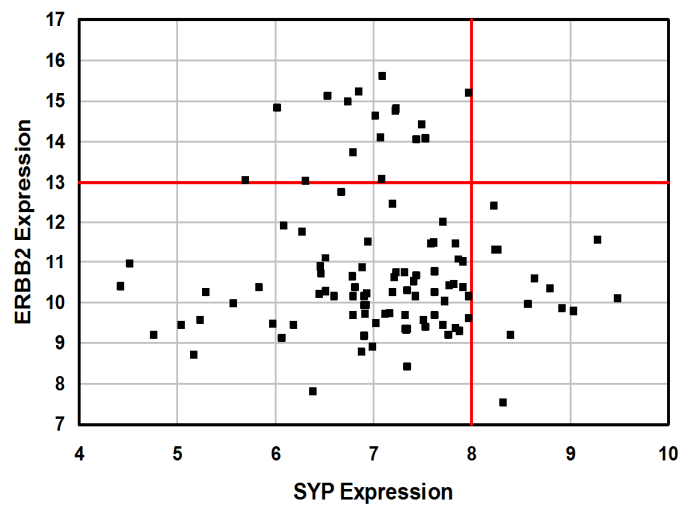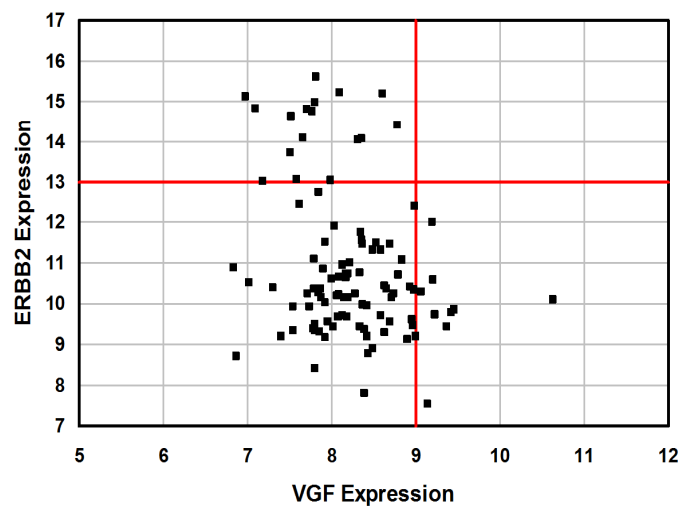

Supplement: 12022_2013_9277_MOESM1_ESM.pdf [file 12022_2013_9277_MOESM1_ESM.pdf]
